# Supplementary material
Source: HighWire-hosted journal article supplement (https://bmjopen.bmj.com/content/10/3/e032890)

## SUPPLEMENTARY MATERIAL

### **Liver function tests and fibrosis scores in a rural population in Africa: a cross-sectional study to estimate the burden of disease and associated risk factors**

Geraldine A O'Hara, Jolyne Mokaya, Jeffrey P Hau, Louise O Downs, Anna L McNaughton<sup>2</sup>, Alex Karabarinde, Gershim Asiki, Janet Seeley, Philippa C Matthews, Robert Newton

---

#### **CONTENTS**

**Suppl Table 1:** Origin, reference ranges and clinical significance of liver function tests (LFTs)

**Suppl Table 2:** Scores to estimate liver fibrosis, calculated from liver function tests

**Suppl Table 3:** Description of characteristics of study participants with liver function test (LFT) results from the Ugandan General Population Cohort (N=8,099)

**Suppl Table 4:** Median and inter-quartile range for each liver function test with the population divided by risk factors

**Suppl Fig 1:** Distribution of liver function tests in Uganda General Population Cohort.

**Suppl Fig 2:** Odds ratio for deranged ALT, AST, APRI, GPR and AST/ALT among participants grouped by sex and age.

**Suppl Fig 3:** Proportion of Uganda General Population cohort reporting alcohol consumption among individuals with and without AST/ALT ratio >2

**Suppl Fig 4:** Proportion of Uganda General Population Cohort with elevated GGT, according to AST/ALT ratio. (A) males, with upper limit of normal GGT=61 (B) females, with upper limit of normal GGT=36. P-values by Fisher's Exact Test

**Suppl Fig 5:** Proportion of Uganda General Population Cohort with blood borne virus (BBV) infection, according to GPR score. P-value by Fisher's Exact Test, showing significant enrichment of BBV infection among individuals with elevated GPR score >0.32.

**Suppl data Table 1: Origin, reference ranges and clinical significance of liver function tests (LFTs) identified from published literature (7,10,54).** LRR: local reference range (derived from populations in Africa); ARR: American reference range.

| Biomarker                        | Origin                                                                                                                                  | LRR               | ARR                                      | Common causes of derangement (Abnormal elevation for all markers other than albumin)                                                                                                                                                                                                                                                                                                                     |
|----------------------------------|-----------------------------------------------------------------------------------------------------------------------------------------|-------------------|------------------------------------------|----------------------------------------------------------------------------------------------------------------------------------------------------------------------------------------------------------------------------------------------------------------------------------------------------------------------------------------------------------------------------------------------------------|
| Alanine transferase (ALT)        | Highest concentration in hepatocytes (small amounts in other tissues: muscles, adipose tissues, intestines, colon, prostate, and brain) | 8 – 61 U/L        | Male: 10 - 55 U/L<br>Female: 7 - 30 U/L  | <ul style="list-style-type: none"> <li>Acute / chronic viral hepatitis (EBV/CMV/HBV/HCV/HEV)</li> <li>Alcoholism</li> <li>Non-alcoholic fatty liver disease (NAFLD)</li> <li>Drugs: antipsychotics, antibiotics, statins.</li> <li>Autoimmune hepatitis</li> <li>Ischaemic liver damage</li> <li>Haemochromatosis</li> <li>Wilson's disease</li> <li>Coeliac disease</li> </ul>                          |
| Aspartate transferase (AST)      | Hepatocytes<br>Cardiac muscle<br>Skeletal muscle                                                                                        | 14 - 60 U/L       | Male: 10 - 40 U/L<br>Female: 9 - 32 U/L  | <ul style="list-style-type: none"> <li>The causes listed for raised ALT.</li> <li>As AST is abundant in skeletal, cardiac and smooth muscle it may also be elevated in patients with cardiac disease, myositis or muscular dystrophy.</li> </ul>                                                                                                                                                         |
| Alkaline phosphatase (ALP)       | Liver (from biliary epithelium)<br>Bone<br>Placenta                                                                                     | 48 - 164 U/L      | Male: 45 - 115 U/L<br>Female: 30–100 U/L | <ul style="list-style-type: none"> <li>Bile duct obstruction</li> <li>Primary biliary cirrhosis</li> <li>Primary sclerosing cholangitis</li> <li>Drugs: Antibiotics, antiepileptics, MAOI's</li> <li>Bone growth, and bone disease</li> <li>Pregnancy</li> <li>Hepatic congestion from right sided heart failure</li> </ul>                                                                              |
| Gamma-glutamyl-transferase (GGT) | Liver<br>Kidney<br>Pancreas<br>Intestine<br>Prostate                                                                                    | Nil available     | Male: 8 - 61 U/L<br>Female: 5 - 36 U/L   | <ul style="list-style-type: none"> <li>Obesity</li> <li>Hepatobiliary disease</li> <li>Pancreatic disease</li> <li>Alcoholism</li> <li>Drugs: carbamazepine, phenytoin, and barbituates.</li> </ul>                                                                                                                                                                                                      |
| Bilirubin (BR)                   | Red blood cells<br>Liver<br>Bone marrow                                                                                                 | 2.9 – 37.0 mmol/L | 0 – 17 mmol/L                            | <p><b>Unconjugated hyperbilirubinaemia</b></p> <ul style="list-style-type: none"> <li>Haemolysis (sickle cell disease and malaria particularly relevant)</li> <li>Ineffective erythropoiesis</li> <li>Gilbert's syndrome</li> <li>Drugs: Rifampicin</li> </ul> <p><b>Conjugated hyperbilirubinaemia</b></p> <ul style="list-style-type: none"> <li>Liver disease</li> <li>Biliary obstruction</li> </ul> |

|               |                            |             |             |                                                                                                                                                                                                                                                                                                                                              |
|---------------|----------------------------|-------------|-------------|----------------------------------------------------------------------------------------------------------------------------------------------------------------------------------------------------------------------------------------------------------------------------------------------------------------------------------------------|
| Albumin (Alb) | Liver; acute phase marker. | 35 – 52 g/L | 35 – 55 g/L | Lowered in association with: <ul style="list-style-type: none"> <li>• Chronic liver disease.</li> <li>• Nephrotic syndrome,</li> <li>• Protein losing enteropathy,</li> <li>• Protein Energy Malnutrition</li> <li>• Hypercatabolic states, e.g. in association with malignancy, infection.</li> <li>• Congestive cardiac failure</li> </ul> |
|---------------|----------------------------|-------------|-------------|----------------------------------------------------------------------------------------------------------------------------------------------------------------------------------------------------------------------------------------------------------------------------------------------------------------------------------------------|

LRR: Local Reference Ranges derived from a study by Karita et al (19). All ranges are for both male and female.

ARR: American Reference Ranges derived from MGH Clinical Laboratories.

MAOI: Monoamine oxidase inhibitors

\*No local references were available for Gamma GT

<sup>4</sup>Bilirubin measurement is total Bilirubin concentration measured in *mmol/L*

**Suppl Table 2: Scores to estimate liver fibrosis, calculated from liver function tests**

| <b>Score</b>   | <b>Formula</b>                                                                               | <b>Threshold used to predict fibrosis</b> | <b>Sensitivity and specificity of fibrosis threshold (derived from previous studies)</b>                                                         |
|----------------|----------------------------------------------------------------------------------------------|-------------------------------------------|--------------------------------------------------------------------------------------------------------------------------------------------------|
| <b>APRI</b>    | $(\text{AST}/\text{ULN AST} \times 100) / \text{platelet count}$                             | 0.7                                       | Sensitivity: 77%<br>Specificity: 72%<br>Derived from meta-analysis of studies of HCV infection (26).                                             |
| <b>FIB-4</b>   | $(\text{Age in years} \times \text{AST}) / (\text{platelet count} \times \sqrt{\text{ALT}})$ | 3.25                                      | Specificity: 97%<br>Positive predictive value: 65%<br>Derived from HIV/HCV coinfecting individuals (27).                                         |
| <b>GPR</b>     | $(\text{GGT}/\text{ULN of GGT}/\text{platelet count}) \times 100$                            | 0.32                                      | Optimal cut-off value for predicting significant fibrosis.<br>Derived from individuals with chronic HBV infection in The Gambia (14).            |
| <b>RPR</b>     | Red cell distribution width%/ platelet count                                                 | 0.825                                     | Sensitivity: 63.1%<br>Specificity: 85.5%<br>Positive predictive value: 65%<br>Derived from individuals with chronic HBV infection in China (28). |
| <b>S-index</b> | $(1000 \times \text{GGT}) \div (\text{platelet count} \times \text{Albumin}^2)$              | 0.3                                       | Specificity: 94%<br>Positive predictive value: 87%<br>Accuracy: 68%<br>Derived from individuals with chronic HBV infection in Egypt (29).        |

AST = Aspartate transaminase at u/l, ULN = upper limit of normal,

ALT = Alanine transaminase at u/l

GGT= Glutamyltransferase at u/l, ULN = upper limit of normal,

Platelet count at  $10^9/\text{L}$

**Suppl Table 3: Description of characteristics of study participants with liver function test (LFT) results from the Ugandan General Population Cohort (N=8,099)**

| <i>Variable</i>                        | <i>Total n(%)</i> | <i>Male n(%)</i> | <i>Female n(%)</i> | <i>p value<sup>1</sup></i> |
|----------------------------------------|-------------------|------------------|--------------------|----------------------------|
|                                        | 8,099 (100.00)    | 3,542 (100.00)   | 4,557 (100.00)     |                            |
| <b>Age Group</b>                       |                   |                  |                    |                            |
| 16-19                                  | 2,481 (30.6)      | 1,268 (35.8)     | 1,213 (26.6)       | <0.001                     |
| 20-29                                  | 1,508 (18.6)      | 618 (17.5)       | 890 (19.5)         | 0.02                       |
| 30-39                                  | 1,349 (16.6)      | 510 (14.4)       | 839 (18.4)         | <0.001                     |
| 40-49                                  | 1,095 (13.5)      | 454 (12.8)       | 641 (14.0)         | 0.10                       |
| 50-59                                  | 744 (9.2)         | 315 (8.9)        | 429 (9.4)          | 0.42                       |
| >60                                    | 922 (11.4)        | 377 (10.8)       | 545 (12.0)         | 0.06                       |
| <b>Max Education</b>                   |                   |                  |                    |                            |
| None                                   | 759 (9.4)         | 208 (5.9)        | 551 (12.1)         | <0.001                     |
| Primary                                | 5,165 (63.8)      | 2,380 (67.2)     | 2,785 (61.1)       | <0.001                     |
| Secondary                              | 1,839 (22.7)      | 793 (22.3)       | 1,046 (23.0)       | 0.54                       |
| Higher Level                           | 336 (4.1)         | 161 (4.5)        | 175 (3.8)          | 0.11                       |
| <b>SES<sup>2</sup></b>                 |                   |                  |                    |                            |
| Lower                                  | 2,309 (34.6)      | 1,048 (35.7)     | 1,261 (33.6)       | 0.08                       |
| Middle                                 | 2,175 (32.5)      | 945 (32.1)       | 1,230 (32.8)       | 0.59                       |
| Upper                                  | 2,203 (32.9)      | 944 (32.1)       | 1,259 (33.6)       | 0.22                       |
| <b>HIV Status</b>                      |                   |                  |                    |                            |
| Negative                               | 7,483 (92.5)      | 3,331 (94.1)     | 4,152 (91.2)       |                            |
| Positive                               | 608 (7.5)         | 208 (5.9)        | 400 (8.8)          | <0.001                     |
| <b>Hepatitis B</b>                     |                   |                  |                    |                            |
| Negative                               | 7,878 (97.3)      | 3,420 (96.6)     | 4,458 (97.8)       |                            |
| Positive                               | 220 (2.7)         | 122 (3.4)        | 98 (2.2)           | <0.001                     |
| <b>Hepatitis C</b>                     |                   |                  |                    |                            |
| Negative                               | 8,086 (99.8)      | 3,533 (99.7)     | 4,553 (99.9)       |                            |
| Positive                               | 13 (0.2)          | 9 (0.3)          | 4 (0.1)            | 0.06                       |
| <b>BMI<sup>3</sup></b>                 |                   |                  |                    |                            |
| Normal weight                          | 5,095 (65.1)      | 2,259 (64.4)     | 2,836 (65.7)       | 0.23                       |
| Underweight                            | 1,772 (22.7)      | 1,075 (30.6)     | 697 (16.1)         | <0.001                     |
| Overweight/Obese                       | 960 (12.2)        | 175 (5.0)        | 785 (18.2)         | <0.001                     |
| <b>Alcohol Consumption<sup>4</sup></b> |                   |                  |                    |                            |
| Never drinkers                         | 5,180 (64.0)      | 2,120 (59.9)     | 3,060 (67.2)       |                            |
| Drinkers                               | 2,919 (36.0)      | 1,422 (40.1)     | 1,497 (32.8)       | <0.001                     |

<sup>1</sup> p-value calculated to determine whether significant difference between males and females in each category using chi-square test

<sup>2</sup> Socio-economic Score (SES) derived from conducting Principle Component Analysis (PCA) on a statistical software using variables relating to household infrastructure and property ownership

<sup>3</sup> Body Mass Index (BMI) Classification according to WHO (weight/height<sup>2</sup>: kg/m<sup>2</sup>): Underweight (<18.5 kg/m<sup>2</sup>), Normal weight (18.5 – 24.99 kg/m<sup>2</sup>), Overweight (25.0 – 29.99 kg/m<sup>2</sup>), Obese (>30.0 kg/m<sup>2</sup>)

<sup>4</sup> Alcohol consumption based on self-reported history of consuming alcohol vs never consuming alcohol

**Suppl Table 4: Median and inter-quartile range for each liver function test, with the population divided by risk factors.**

|                        | ALT <sup>1,2</sup><br>Median<br>(IQR) | AST <sup>1</sup><br>Median<br>(IQR) | ALP <sup>1</sup><br>Median<br>(IQR) | GGT <sup>1</sup><br>Median<br>(IQR) | Total BR <sup>1</sup><br>Median<br>(IQR) | FIB-4 <sup>1</sup><br>Median<br>(IQR) | APRI <sup>1,3</sup><br>Median<br>(IQR) | GPR <sup>1</sup><br>Median<br>(IQR) | S-Index <sup>3</sup><br>Median<br>(IQR) |
|------------------------|---------------------------------------|-------------------------------------|-------------------------------------|-------------------------------------|------------------------------------------|---------------------------------------|----------------------------------------|-------------------------------------|-----------------------------------------|
| <b>Sex</b>             |                                       |                                     |                                     |                                     |                                          |                                       |                                        |                                     |                                         |
| Male                   | 19.4<br>(15.6-25.0)                   | 27.9<br>(23.9-33.5)                 | 97.1<br>(74.3-209.9)                | 21.6<br>(15.5-32.8)                 | 8.9<br>(5.9-14.1)                        | 0.90<br>(0.49-1.57)                   | 0.24<br>(0.18-0.33)                    | 0.17<br>(0.12-0.30)                 | 0.06<br>(0.04-0.11)                     |
| Female                 | 16.4<br>(13.0-21.3)                   | 23.1<br>(19.8-27.4)                 | 89.5<br>(68.5-123.2)                | 16.9<br>(12.3-24.4)                 | 6.9<br>(4.8-10.4)                        | 0.81<br>(0.47-1.40)                   | 0.18<br>(0.14-0.24)                    | 0.21<br>(0.15-0.32)                 | 0.04<br>(0.03-0.07)                     |
| <i>p-value</i>         | ***                                   | ***                                 | ***                                 | ***                                 | ***                                      | **                                    | ***                                    | ***                                 | ***                                     |
| <b>Age</b>             |                                       |                                     |                                     |                                     |                                          |                                       |                                        |                                     |                                         |
| <19                    | 17.8<br>(14.5-22.1)                   | 26.5<br>(22.6-31.4)                 | 218.8<br>(134.5-306.0)              | 16.2<br>(12.6-21.2)                 | 7.26<br>(4.97-11.4)                      | 0.42<br>(0.33-0.54)                   | 0.19<br>(0.15-0.25)                    | 0.15 (0.11-0.21)                    | 0.04<br>(0.03-0.05)                     |
| 20-29                  | 18.0<br>(13.8-23.8)                   | 23.8<br>(19.9-28.5)                 | 82.4<br>(66.8-102.8)                | 17.7<br>(12.5-25.3)                 | 8.59<br>(5.69-13.9)                      | 0.65<br>(0.50-0.90)                   | 0.19<br>(0.15-0.30)                    | 0.18 (0.13-0.27)                    | 0.05<br>(0.03-0.07)                     |
| 30-39                  | 18.3<br>(13.9-24.5)                   | 24.1<br>(20.1-29.6)                 | 74.8<br>(59.9-94.5)                 | 20.0<br>(13.7-32.0)                 | 7.88<br>(5.28-12.7)                      | 1.02<br>(0.78-1.34)                   | 0.21<br>(0.16-0.29)                    | 0.23 (0.16-0.39)                    | 0.06<br>(0.04-0.11)                     |
| 40-49                  | 18.4<br>(14.3-24.1)                   | 25.1<br>(21.0-31.1)                 | 74.7<br>(60.3-90.0)                 | 22.0<br>(14.8-36.7)                 | 7.78<br>(5.08-12.1)                      | 1.36<br>(1.03-1.80)                   | 0.23<br>(0.16-0.32)                    | 0.25 (0.17-0.45)                    | 0.07<br>(0.04-0.14)                     |
| 50-59                  | 18.3<br>(14.2-23.6)                   | 25.7<br>(21.5-32.0)                 | 83.2<br>(71.6-99.4)                 | 24.1<br>(16.7-38.1)                 | 7.41<br>(5.41-11.4)                      | 1.66<br>(1.32-2.29)                   | 0.22<br>(0.17-0.32)                    | 0.29 (0.19-0.48)                    | 0.08<br>(0.05-0.13)                     |
| >60                    | 15.4<br>(12.3-20.0)                   | 24.9<br>(21.4-29.9)                 | 89.5<br>(73.9-107.9)                | 23.7<br>(16.2-35.7)                 | 7.16<br>(4.90-10.4)                      | 2.20<br>(1.61-3.23)                   | 0.20<br>(0.16-0.29)                    | 0.26 (0.18-0.43)                    | 0.08<br>(0.04-0.12)                     |
| <i>p-value</i>         | ***                                   | ***                                 | ***                                 | ***                                 | ***                                      | ***                                   | ***                                    | ***                                 | ***                                     |
| <b>Alcohol</b>         |                                       |                                     |                                     |                                     |                                          |                                       |                                        |                                     |                                         |
| No                     | 17.6<br>(13.9-22.4)                   | 24.9<br>(21.1-29.7)                 | 103.0<br>(74.3-204.3)               | 17.3<br>(12.8-23.7)                 | 7.57<br>(5.16-12.0)                      | 0.61<br>(0.40-1.08)                   | 0.20<br>(0.15-0.27)                    | 0.17<br>(0.12-0.26)                 | 0.04<br>(0.03-0.07)                     |
| Yes                    | 17.9<br>(13.9-24.0)                   | 25.2<br>(21.4-31.8)                 | 83.0<br>(67.1-103.9)                | 23.2<br>(15.6-38.9)                 | 7.77<br>(5.24-12.1)                      | 1.40<br>(0.88-2.14)                   | 0.22<br>(0.17-0.32)                    | 0.26<br>(0.17-0.46)                 | 0.07<br>(0.04-0.14)                     |
| <i>p-value</i>         | **                                    | ***                                 | ***                                 | ***                                 | ns                                       | ***                                   | ***                                    | ***                                 | ***                                     |
| <b>BMI<sup>2</sup></b> |                                       |                                     |                                     |                                     |                                          |                                       |                                        |                                     |                                         |
| Normal                 | 17.9<br>(14.3-22.8)                   | 27.5<br>(23.3-32.8)                 | 185.2<br>(90.9-297.0)               | 18.5<br>(13.7-26.0)                 | 7.09<br>(4.85-11.2)                      | 0.53<br>(0.35-1.38)                   | 0.21<br>(0.16-0.29)                    | 0.17<br>(0.12-0.27)                 | 0.04<br>(0.03-0.08)                     |
| Under-weight           | 17.9<br>(14.1-23.2)                   | 25.0<br>(21.3-30.1)                 | 88.1<br>(69.1-122.5)                | 18.7<br>(13.7-27.8)                 | 8.00<br>(5.39-12.8)                      | 0.90<br>(0.51-1.52)                   | 0.21<br>(0.15-0.39)                    | 0.20<br>(0.14-0.32)                 | 0.05<br>(0.03-0.08)                     |
| Over-weight            | 18.0<br>(13.9-23.1)                   | 22.7<br>(19.4-27.0)                 | 81.3<br>(65.2-99.1)                 | 21.8<br>(14.8-31.5)                 | 7.28<br>(5.12-10.9)                      | 0.96<br>(0.61-1.42)                   | 0.18<br>(0.14-0.25)                    | 0.23<br>(0.16-0.38)                 | 0.06<br>(0.04-0.09)                     |
| <i>p-value</i>         | ns                                    | ***                                 | ***                                 | ***                                 | ***                                      | ***                                   | ***                                    | ***                                 | ns                                      |
| <b>HIV status</b>      |                                       |                                     |                                     |                                     |                                          |                                       |                                        |                                     |                                         |
| Negative               | 17.6<br>(13.9-22.7)                   | 25.0<br>(21.2-30.0)                 | 93.7<br>(71.8-151.3)                | 18.4<br>(13.4-26.6)                 | 7.89<br>(5.40-12.4)                      | 0.82<br>(0.46-1.46)                   | 0.20<br>(0.15-0.28)                    | 0.19<br>(0.13-0.29)                 | 0.05<br>(0.03-0.08)                     |
| Positive               | 19.4<br>(14.9-26.5)                   | 27.1<br>(22.3-33.5)                 | 83.2<br>(65.1-107.8)                | 30.6<br>(16.7-58.3)                 | 5.06<br>(3.53-7.66)                      | 1.21<br>(0.76-1.70)                   | 0.23<br>(0.18-0.34)                    | 0.44<br>(0.20-0.79)                 | 0.11<br>(0.05-0.20)                     |
| <i>p-value</i>         | ***                                   | ***                                 | ***                                 | ***                                 | ***                                      | ***                                   | ***                                    | ***                                 | ***                                     |
| <b>HBV status</b>      |                                       |                                     |                                     |                                     |                                          |                                       |                                        |                                     |                                         |
| Negative               | 17.7<br>(13.9-22.7)                   | 25.1<br>(21.1-30.2)                 | 92.6<br>(71.3-144.8)                | 18.6<br>(13.5-27.6)                 | 7.62<br>(5.19-12.0)                      | 0.84<br>(0.47-1.47)                   | 0.20<br>(0.15-0.27)                    | 0.19<br>(0.13-0.31)                 | 0.05<br>(0.03-0.08)                     |
| Positive               | 22.0<br>(15.8-29.2)                   | 28.2<br>(23.0-39.0)                 | 91.9<br>(71.6-131.5)                | 23.5<br>(15.4-37.6)                 | 8.76<br>(5.34-13.4)                      | 1.01<br>(0.55-1.80)                   | 0.25<br>(0.19-0.48)                    | 0.32<br>(0.17-0.52)                 | 0.11<br>(0.06-0.20)                     |
| <i>p-value</i>         | ***                                   | ***                                 | ns                                  | ***                                 | *                                        | ns                                    | ***                                    | ***                                 | ***                                     |

<sup>1</sup> ALT - Alanine Transaminase, AST - Aspartate Transaminase, GGT - Gamma-glutamyl transpeptidase, ALP - Alkaline Phosphatase, TB -

Total Bilirubin, FIB-4 - fibrosis 4, APRI - AST to Platelet Ratio Index, GPR - GGT to platelet ratio, IQR - inter-quartile range

<sup>2</sup> Body Mass Index (BMI) Classification according to WHO (weight/height<sup>2</sup>: kg/m<sup>2</sup>): Underweight (<18.5 kg/m<sup>2</sup>), Normal weight (18.5 – 24.99 kg/m<sup>2</sup>), Overweight (25.0 – 29.99 kg/m<sup>2</sup>), Obese (>30.0 kg/m<sup>2</sup>)

<sup>3</sup> An S-index score of >0.3 is suggestive of liver fibrosis

# APRI score calculated using ULN of AST using African reference range

p-value significance level: \* = (p<0.05), \*\* = (p<0.01), \*\*\* = (p<0.001), ns = (p>0.05)

**Suppl Fig 1: Distribution of liver function tests in Uganda General Population Cohort.** Top row: ALT -alanine transferase, AST – aspartate transferase, GGT – gamma glutamyl transferase. Bottom row: BR – bilirubin, ALP – alkaline phosphatase.

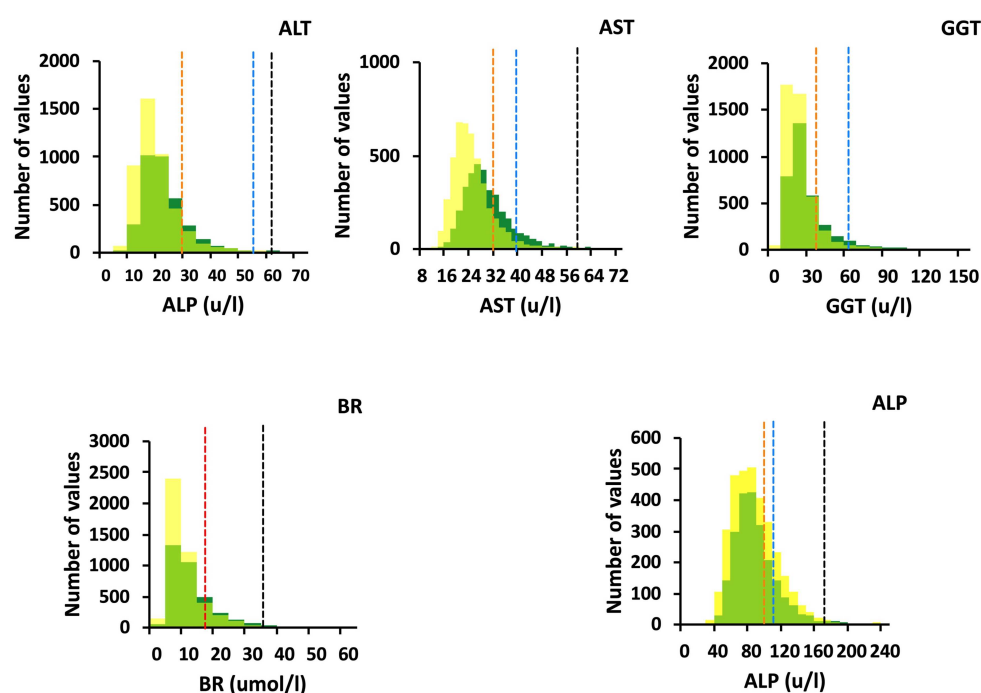

**Suppl Fig 2: Odds ratio for deranged ALT, AST, APRI, GPR and AST/ALT among participants of te General Population Cohort in Uganda. Data grouped by sex and age, by multivariate analysis.**

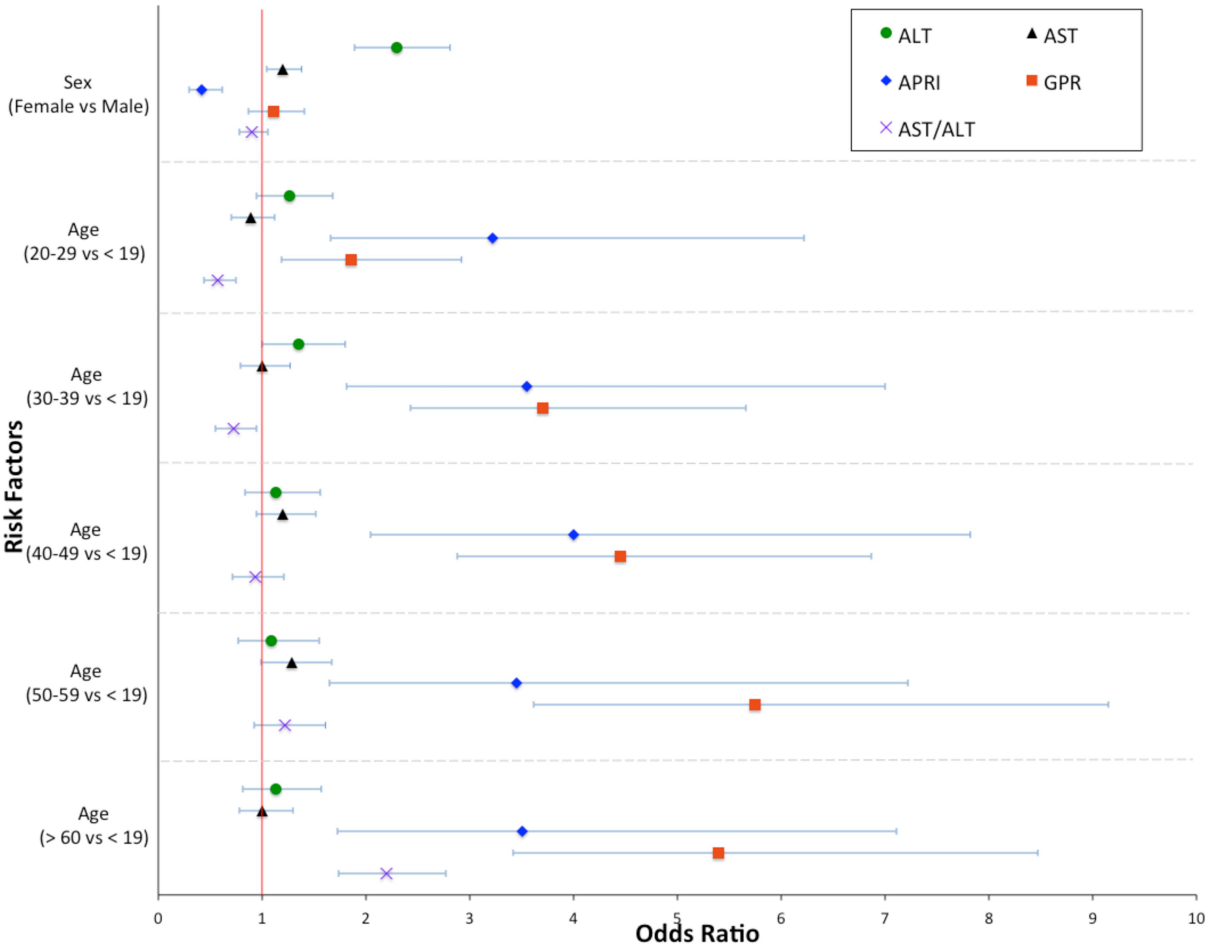



**Suppl Fig 3:** Proportion of Uganda General Population Cohort reporting alcohol consumption among individuals with and without AST/ALT ratio >2

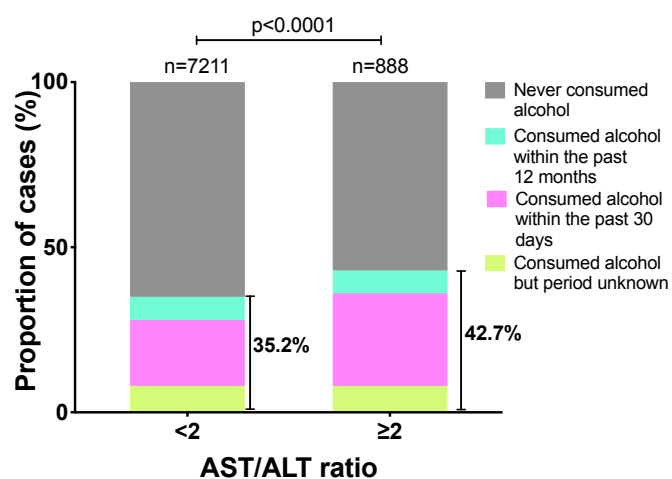

**Suppl Fig 4: Proportion of Uganda General Population Cohort with elevated GGT, according to AST/ALT ratio.** (A) males, with upper limit of normal GGT=61 (B) females, with upper limit of normal GGT=36. P-values by Fisher's Exact Test

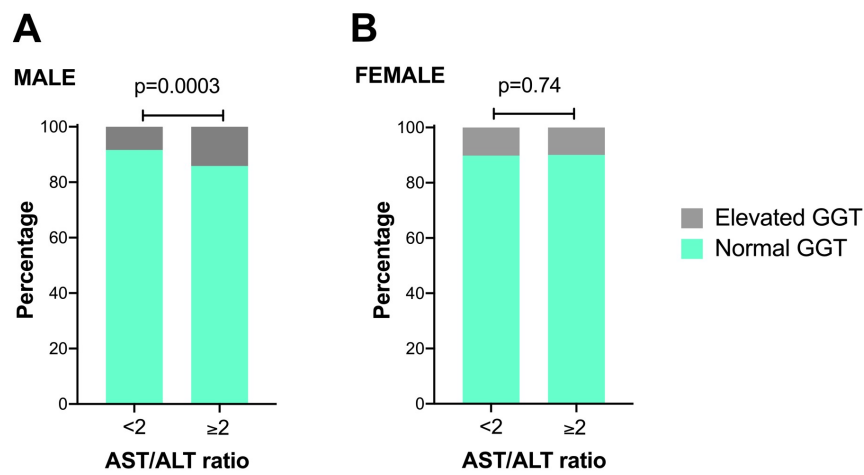

**Suppl Fig 5: Proportion of Uganda General Population Cohort with blood borne virus (BBV) infection, according to GPR score.** P-value by Fisher's Exact Test, showing significant enrichment of BBV infection among individuals with elevated GPR score >0.32.

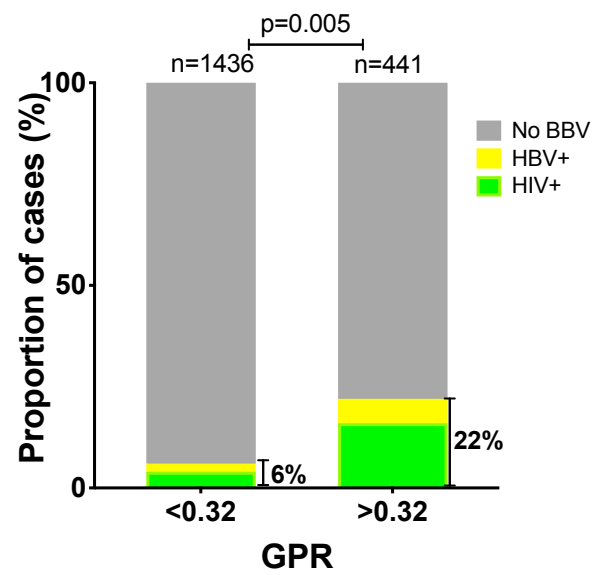

Supplement: inline-supplementary-material-1 [file inline-supplementary-material-1.pdf]
